# Supplementary material for: Association of depressive symptoms with quality of life and treatment efficacy in patients with intermediate or advanced hepatocellular carcinoma receiving immunotherapy: A prospective cohort study
Source: Research Square preprint supplement (doi:10.21203/rs.3.rs-5768098/v1), 2025-01-08
Supplement: Supplementary file 1 [file 44442cc9d73374d8d3ba68be.docx]

**eTable 1. Immunotherapy efficacy in patients with hepatocellular carcinoma according to depressive symptoms status**

| Efficacy | Depression (n=76) | No Depression (n=80) | *P* |
| --- | --- | --- | --- |
| Efficacy |  |  |  |
| CR | 1 (1.3%) | 3 (3.8%) | 0.649 |
| PR | 7 (9.2%) | 27 (33.8%) | <0.001 |
| SD | 32 (42.1%) | 43 (53.8%) | 0.146 |
| PD | 36 (47.4%) | 7 (8.8%) | <0.001 |
| ORR | 8 (10.5%) | 30 (37.5%) | <0.001 |
| DCR | 40 (52.6%) | 73 (91.2%) | <0.001 |

Abbreviations: CR, complete response; PR, partial response; SD, stable disease; PD, progression disease; ORR, objective response rate; DCR, disease control rate.
